# Supplementary material for: Enhancing the osmotic energy conversion of a nanoporous membrane: influence of pore density, pH, and temperature
Source: Royal Society of Chemistry journal article supplement (doi:10.1039/d2cp05831f), 2023-01-01
Supplement: d2cp05831f1.pdf [file d2cp05831f1.pdf]

## Supporting Information

### Enhancing the osmotic energy conversion of a nanoporous membrane: influence of pore density, pH, and temperature

Ding-Cheng Zheng and Jyh-Ping Hsu\*

Department of Chemical Engineering, National Taiwan University, Taipei 10617, Taiwan

Tel: 886-2-23637448; e-mail: [jphsu@ntu.edu.tw](mailto:jphsu@ntu.edu.tw)

**Table S1.** Dependence of pore density on pore-pore distance.

| Pore-pore distance $a_1$ (nm) | Pore density (pores/cm <sup>2</sup> ) |
|-------------------------------|---------------------------------------|
| 200                           | $2.5 \times 10^9$                     |
| 320                           | $9.8 \times 10^8$                     |
| 450                           | $5.0 \times 10^8$                     |
| 600                           | $2.8 \times 10^8$                     |
| 800                           | $1.6 \times 10^8$                     |
| 1000                          | $1.0 \times 10^8$                     |
| 2000                          | $2.5 \times 10^7$                     |
| 3200                          | $1.0 \times 10^7$                     |
| 10000                         | $1.0 \times 10^6$                     |

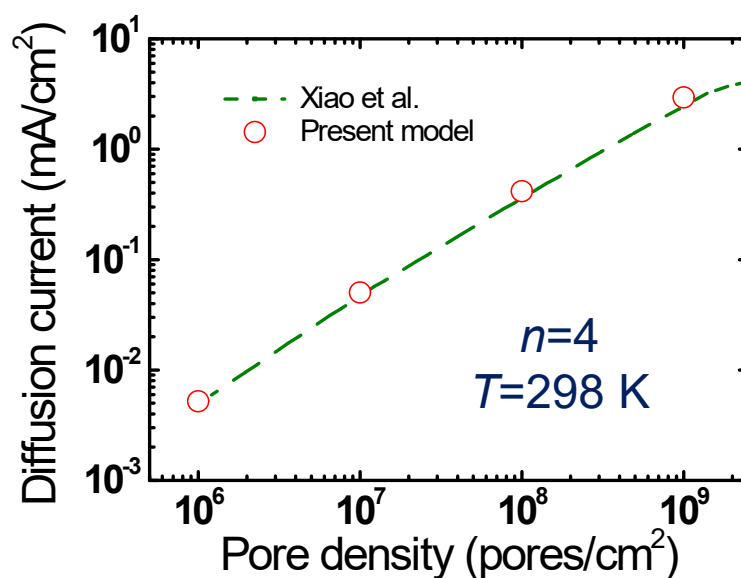

**Fig. S1** Variation of diffusion current with pore density for a multi-pore system with  $a_0=5$   $\mu\text{m}$  (infinite reservoir). Parameters used:  $L=1000$  nm,  $d=10$  nm,  $\sigma_s=-0.06$  C/m<sup>2</sup>,  $C_H/C_L=100$  mM/1 mM, and  $T=298$  K,  $n=4$ , and  $H_{\text{res}}=2000$  nm. The pore density is adjusted by the pore-pore distance  $a_1$  (Table S1).

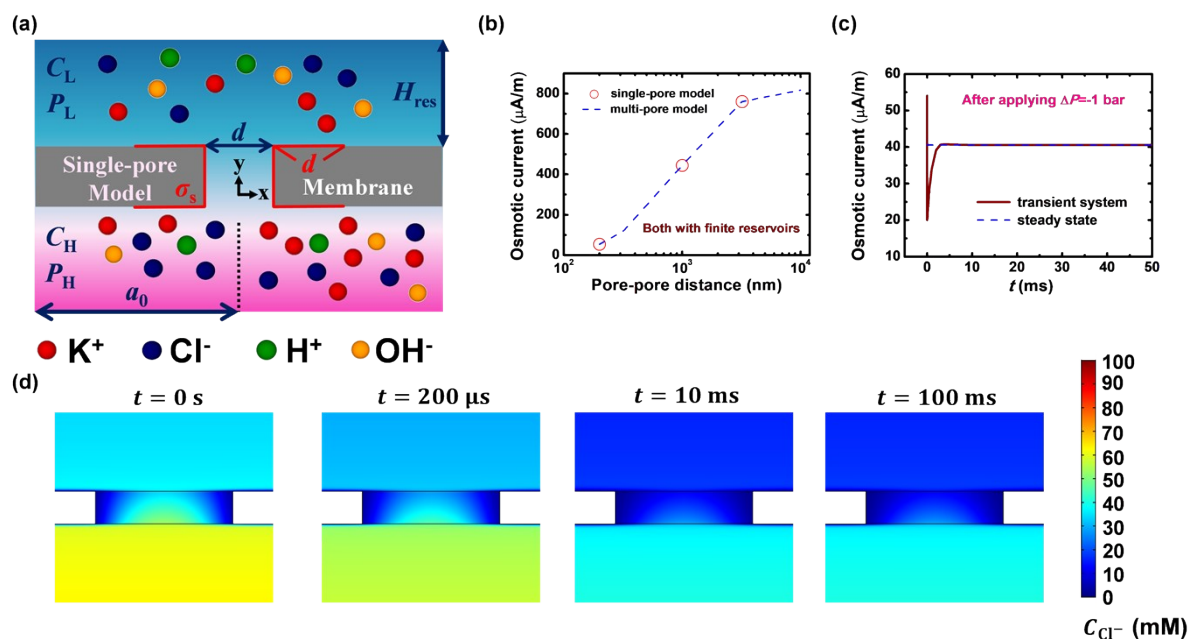

**Fig. S2** (a) Schematic representation of a single-pore system, where a cylindrical nanopore connects two large, identical reservoirs with  $a_0$  being half width. The boundary marked red has the surface charge density  $\sigma_s$ . (b) Variation of osmotic current with pore-pore distance; both the results for single-pore and those for multi-pore are presented. Temporal variation of osmotic current, (c), and  $\text{Cl}^-$  concentration, (d), after a  $\Delta P = -1$  bar is applied for the case of  $a_1 = 200$  nm. The parameters used in (b)-(d) are  $L = 50$  nm,  $d = 10$  nm, pH 8,  $C_H/C_L = 100$  mM/1 mM,  $T = 298$  K,  $H_{\text{res}} = 2000$  nm, and  $a_0 = a_1/2$ .

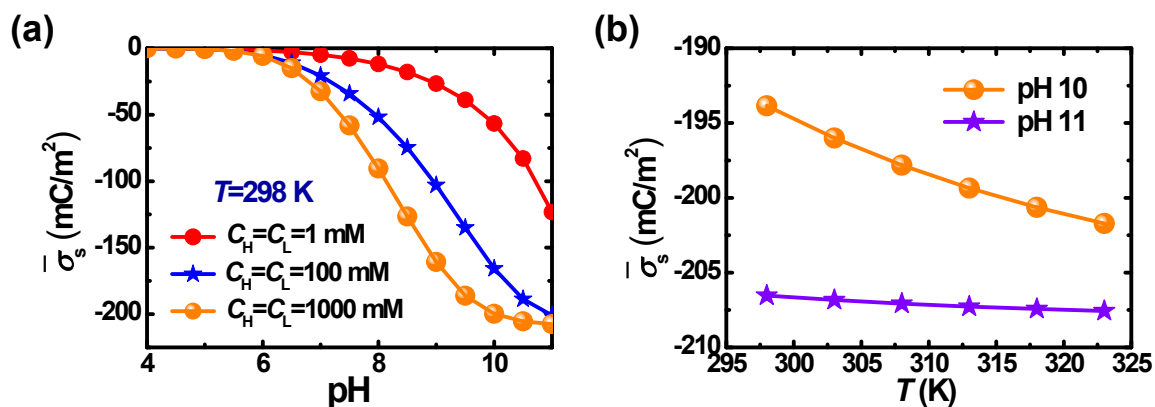

**Fig. S3** (a) Variation of averaged surface charge density of the wall  $\bar{\sigma}_s$  with pH for different bulk concentrations. (b) Variation of  $\bar{\sigma}_s$  with temperature for two pH levels. The parameters used in (b) are  $L=600$  nm,  $d=10$  nm,  $C_H/C_L=1000$  mM/1 mM,  $H_{res}=2000$  nm, and  $a_0=a_1/2=100$  nm.

**Table S2.** Dependence of pore density on pore-pore distance and the corresponding porosity.

| Pore-pore distance<br>$a_1$ (nm) | Pore density<br>(pores/cm <sup>2</sup> ) | Porosity (%)<br>when $d=10$ nm |
|----------------------------------|------------------------------------------|--------------------------------|
| 50                               | $4.0 \times 10^{10}$                     | 3.142                          |
| 100                              | $1.0 \times 10^{10}$                     | 0.785                          |
| 140                              | $5.1 \times 10^9$                        | 0.401                          |
| 200                              | $2.5 \times 10^9$                        | 0.196                          |

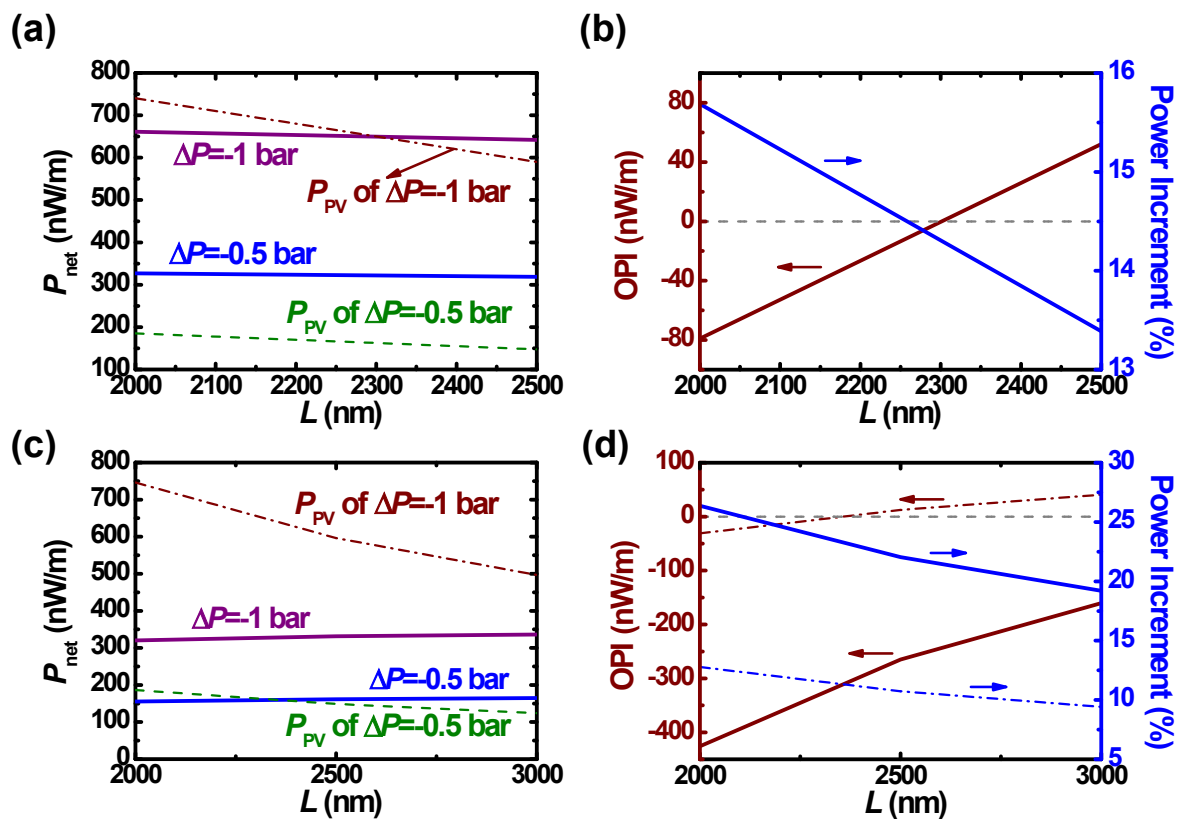

**Fig. S4** Variation of the net power  $P_{net}$ , (a) and (c), and overall power increment OPI and power increment PI, (b) and (d), with pore length. In (a) and (c), green dashed curve: power of PV work  $P_{PV}$  of  $\Delta P = -0.5$  bar; wine dash-dotted curve: power of PV work  $P_{PV}$  of  $\Delta P = -1$  bar. In (b) and (d), gray dashed curve: OPI=0. In (d), dash-dotted curve:  $\Delta P = -0.5$  bar; solid curve:  $\Delta P = -1$  bar. Parameters used are  $d=10$  nm,  $C_H/C_L=1000$  mM/1 mM,  $T=323$  K, pH 11,  $H_{res}=2000$  nm, and  $a_0=a_1/2$ . In (a) and (b),  $a_1=100$  nm. In (c) and (d),  $a_1=50$  nm.
